# Supplementary material for: Genome-Wide Meta-Analysis of Homocysteine and Methionine Metabolism Identifies Five One Carbon Metabolism Loci and a Novel Association of ALDH1L1 with Ischemic Stroke
Source: PubMed Central journal article supplement (PMC3961178; doi:10.1371/journal.pgen.1004214), 2014-03-20

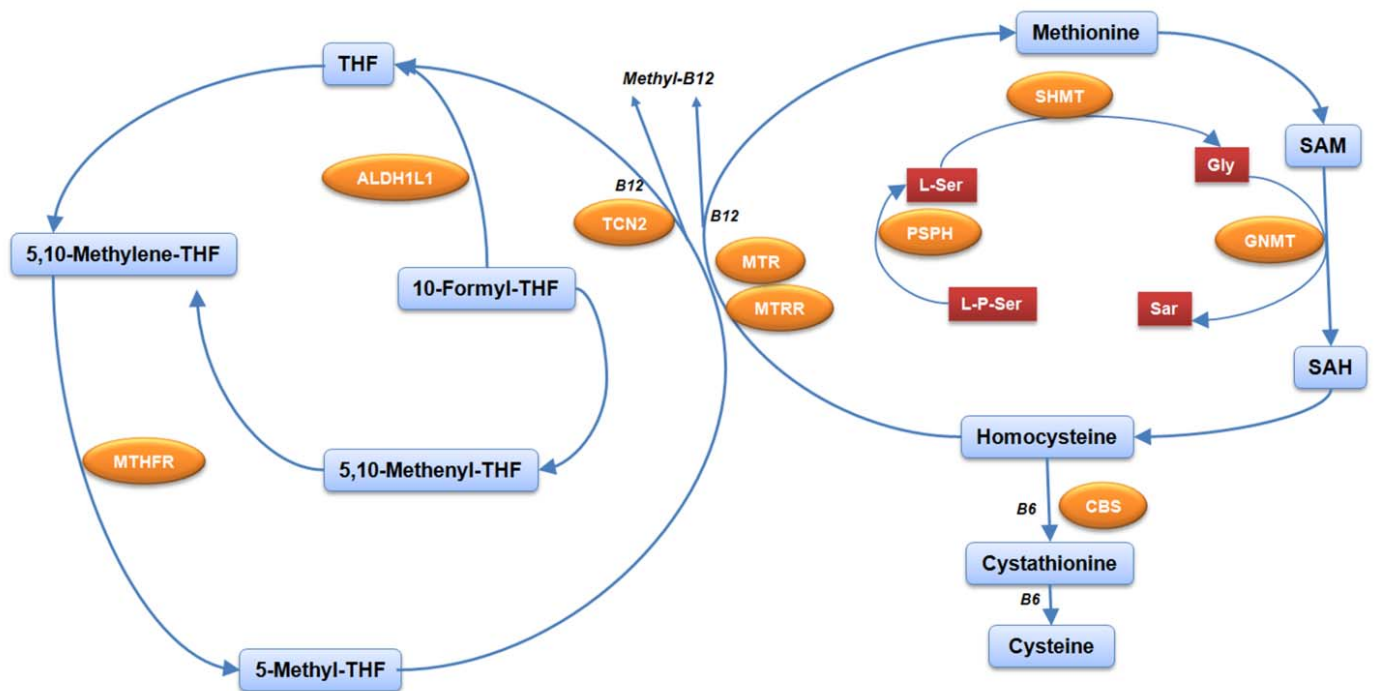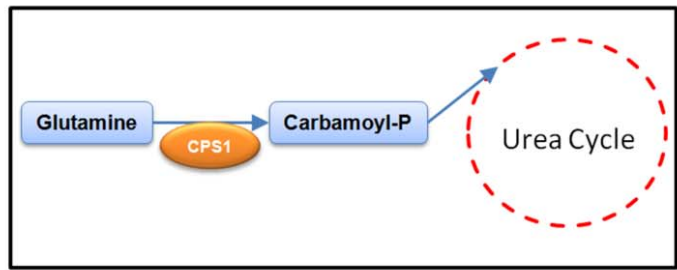

Supplement: pgen.1004214.s003.pdf [file pgen.1004214.s003.pdf]
