# Supplementary material for: Genome-Wide Meta-Analysis of Homocysteine and Methionine Metabolism Identifies Five One Carbon Metabolism Loci and a Novel Association of ALDH1L1 with Ischemic Stroke
Source: PubMed Central journal article supplement (PMC3961178; doi:10.1371/journal.pgen.1004214), 2014-03-20
Supplement: pgen.1004214.s004.pdf [file pgen.1004214.s004.pdf]

|               |     |  |                                                             |     |     |     |     |
|---------------|-----|--|-------------------------------------------------------------|-----|-----|-----|-----|
|               |     |  | 10                                                          | 20  | 30  | 40  | 50  |
| Reference     | 1   |  | ..... ..... ..... ..... ..... ..... ..... ..... ..... ..... |     |     |     |     |
| HighDeltaPOST | 1   |  | AGCCTGGCGACAGAGCGAGACTGTGTCTCAAAACAAAAACAAAAACAAA           |     |     |     |     |
| LowDeltaPOST  | 1   |  | -GGGTACC-ACAGAGCGAGACTGTGTCTCAAAACAAAAACAAAAACAAA           |     |     |     |     |
|               |     |  | 60                                                          | 70  | 80  | 90  | 100 |
| Reference     | 51  |  | ..... ..... ..... ..... ..... ..... ..... ..... ..... ..... |     |     |     |     |
| HighDeltaPOST | 49  |  | AAAAACCCTGCAGTTGCTTCCATGTTTAGGCGCTGCCACCAAGGGTCCC           |     |     |     |     |
| LowDeltaPOST  | 49  |  | AAAAACCCTGCAGTTGCTTCCATGTTTAGGCGCTGCCACCAAGGGTCCC           |     |     |     |     |
|               |     |  | 110                                                         | 120 | 130 | 140 | 150 |
| Reference     | 101 |  | ..... ..... ..... ..... ..... ..... ..... ..... ..... ..... |     |     |     |     |
| HighDeltaPOST | 99  |  | AAGTTGGAAGGAAGGAGGAGAGAGGCAGAGAGAGAGAGAGAGAGAGA             |     |     |     |     |
| LowDeltaPOST  | 99  |  | AAGTTGGAAGGAAGGAGGAGAGAGGCAGAGAGAGAGAGAGAGAGAGA             |     |     |     |     |
|               |     |  | 160                                                         | 170 | 180 | 190 | 200 |
| Reference     | 151 |  | ..... ..... ..... ..... ..... ..... ..... ..... ..... ..... |     |     |     |     |
| HighDeltaPOST | 140 |  | GA--GAGAGAGAAGCGGAGAGCGGCCCTGTAATTGAGCAGAAAGGAAAG           |     |     |     |     |
| LowDeltaPOST  | 149 |  | ---GAGAGAGAAGCGGAGAGCGGCCCTGTAATTGAGCAGAAAGGAAAG            |     |     |     |     |
|               |     |  | 210                                                         | 220 | 230 | 240 | 250 |
| Reference     | 199 |  | ..... ..... ..... ..... ..... ..... ..... ..... ..... ..... |     |     |     |     |
| HighDeltaPOST | 187 |  | GGAGAAAAATGAATCCCAAACCTTTGGGCTTACCTCTTTCTGCTGGCTGGC         |     |     |     |     |
| LowDeltaPOST  | 199 |  | GGAGAAAAATGAATCCCAAACCTTTGGGCTTACCTCTTTCTGCTGGCTGGC         |     |     |     |     |
|               |     |  | 260                                                         | 270 | 280 | 290 | 300 |
| Reference     | 249 |  | ..... ..... ..... ..... ..... ..... ..... ..... ..... ..... |     |     |     |     |
| HighDeltaPOST | 237 |  | TCGCCAAAATATGTTAACGGTAGAGGATGTCCAGGTTCTTGGCATCTTGA          |     |     |     |     |
| LowDeltaPOST  | 249 |  | TCGCCAAAATATGTTAACGGTAGAGGATGTCCAGGTTCTTGGCATCTTGA          |     |     |     |     |
|               |     |  | 310                                                         | 320 | 330 | 340 | 350 |
| Reference     | 299 |  | ..... ..... ..... ..... ..... ..... ..... ..... ..... ..... |     |     |     |     |
| HighDeltaPOST | 287 |  | ACAAACAATTGGACAAAATGCACAAACAAAGCAAGAAAGGAATGAAGGAT          |     |     |     |     |
| LowDeltaPOST  | 299 |  | ACAAACAATTGGACAAAATGCACAAACAAAGCAAGAAAGGAATGAAGGAT          |     |     |     |     |
|               |     |  | 360                                                         | 370 | 380 | 390 | 400 |
| Reference     | 349 |  | ..... ..... ..... ..... ..... ..... ..... ..... ..... ..... |     |     |     |     |
| HighDeltaPOST | 337 |  | TTTATTGAAAATGAAAGTACACTCCACAGTGTGGGAGCGAGCATGAGCAT          |     |     |     |     |
| LowDeltaPOST  | 349 |  | TTTATTGAAAATGAAAGTACACCCCAGTGTGGGAGCGAGCATGAGCAT            |     |     |     |     |
|               |     |  | 410                                                         | 420 | 430 | 440 | 450 |
| Reference     | 399 |  | ..... ..... ..... ..... ..... ..... ..... ..... ..... ..... |     |     |     |     |
| HighDeltaPOST | 387 |  | AGGGGCTCAAAGGCCCTGTTACA----TTTTGTGAGTTTAAATACCCTCT          |     |     |     |     |
| LowDeltaPOST  | 399 |  | AGGGGCTCAAAGGCCCTGTTACA----TTTTGTGAGTTTAAATACCCTCT          |     |     |     |     |
|               |     |  | 460                                                         | 470 | 480 | 490 | 500 |
| Reference     | 445 |  | ..... ..... ..... ..... ..... ..... ..... ..... ..... ..... |     |     |     |     |
|               |     |  | ACTTGGGGTACACCCTATGTAATGAAGAGGATGAAGTAAAGTTACAGTT           |     |     |     |     |

|               |     |                                                                                                                                                                                                                                                                                                                                                                         |
|---------------|-----|-------------------------------------------------------------------------------------------------------------------------------------------------------------------------------------------------------------------------------------------------------------------------------------------------------------------------------------------------------------------------|
| HighDeltaPOST | 437 | ACTTGGGGTACACCCTATGTAAATGAAGAGGATGAAGTAAAGTTACAGTT                                                                                                                                                                                                                                                                                                                      |
| LowDeltaPOST  | 445 | ACTTGGGGTACACCCTATGTAAATGAAGAGGATGAAGTAAAGTTACAGTT                                                                                                                                                                                                                                                                                                                      |
|               |     | <div style="display: flex; justify-content: space-between; width: 100%;"> <span>510</span> <span>520</span> <span>530</span> <span>540</span> <span>550</span> </div> <div style="display: flex; justify-content: space-between; width: 100%; font-size: small;"> <span>.....</span> <span>.....</span> <span>.....</span> <span>.....</span> <span>.....</span> </div> |
| Reference     | 495 | ACAAAGTTATTAATGGCGGGCATAACGCCCTATGGAGAGGATATT <b>T</b> CCCGT                                                                                                                                                                                                                                                                                                            |
| HighDeltaPOST | 487 | ACAAAGTTATTAATGGCGGGCATAACGCCCTATGGAGAGGATATT <b>C</b> CCCGT                                                                                                                                                                                                                                                                                                            |
| LowDeltaPOST  | 495 | ACAAAGTTATTAATGGCGGGCATAACGCCCTATGGAGAGGATATT <b>T</b> CCCGT                                                                                                                                                                                                                                                                                                            |
|               |     | <div style="display: flex; justify-content: space-between; width: 100%;"> <span>560</span> <span>570</span> <span>580</span> <span>590</span> <span>600</span> </div> <div style="display: flex; justify-content: space-between; width: 100%; font-size: small;"> <span>.....</span> <span>.....</span> <span>.....</span> <span>.....</span> <span>.....</span> </div> |
| Reference     | 545 | TAT <b>T</b> AACTGAAGTGTGAATTGGCCTTATGTTCCCTGTCTCTAGACCCTATT                                                                                                                                                                                                                                                                                                            |
| HighDeltaPOST | 537 | TAT <b>C</b> AACTGAAGTGTGAATTGGCCTTATGTTCCCTGTCTCTAGACCCTATT                                                                                                                                                                                                                                                                                                            |
| LowDeltaPOST  | 545 | TAT <b>T</b> AACTGAAGTGTGAATTGGCCTTATGTTCCCTGTCTCTAGACCCTATT                                                                                                                                                                                                                                                                                                            |
|               |     | <div style="display: flex; justify-content: space-between; width: 100%;"> <span>610</span> <span>620</span> <span>630</span> <span>640</span> <span>650</span> </div> <div style="display: flex; justify-content: space-between; width: 100%; font-size: small;"> <span>.....</span> <span>.....</span> <span>.....</span> <span>.....</span> <span>.....</span> </div> |
| Reference     | 595 | CTCCTGCTTCCTGTGAAAGCAGAGGGTTTTGTTTGTGTTTTTGTCTTTTTGT                                                                                                                                                                                                                                                                                                                    |
| HighDeltaPOST | 587 | CTCCTGCTTCCTGTGAAAGCAGAGGGTTTTGTTTGTGTTTTTGTCTTTTTGT                                                                                                                                                                                                                                                                                                                    |
| LowDeltaPOST  | 595 | CTCCTGCTTCCTGTGAAAGCAGAGGGTTTTGTTTGTGTTTTTGTCTTTTTGT                                                                                                                                                                                                                                                                                                                    |
|               |     | <div style="display: flex; justify-content: space-between; width: 100%;"> <span>660</span> <span>670</span> <span>680</span> <span>690</span> <span>700</span> </div> <div style="display: flex; justify-content: space-between; width: 100%; font-size: small;"> <span>.....</span> <span>.....</span> <span>.....</span> <span>.....</span> <span>.....</span> </div> |
| Reference     | 645 | TTTTTGAGACGGAGTCTTGCTCTGTTGCCAGGCTGGAGTGCAGTGGTGC                                                                                                                                                                                                                                                                                                                       |
| HighDeltaPOST | 637 | TTTTTGAGACGGAGTCTTGCTCTGTTGCCAGGCTGGAGTGCAGTGGTGC                                                                                                                                                                                                                                                                                                                       |
| LowDeltaPOST  | 645 | TTTTTGAGACGGAGTCTTGCTCTGTTGCCAGGCTGGAGTGCAGTGGTGC                                                                                                                                                                                                                                                                                                                       |
|               |     | <div style="display: flex; justify-content: space-between; width: 100%;"> <span>710</span> <span>720</span> <span>730</span> <span>740</span> <span>750</span> </div> <div style="display: flex; justify-content: space-between; width: 100%; font-size: small;"> <span>.....</span> <span>.....</span> <span>.....</span> <span>.....</span> <span>.....</span> </div> |
| Reference     | 695 | ACTCGGCTCACTGCAACTTCCGCCTTCCCGGGTTCAAGCGATTCTCCTGG                                                                                                                                                                                                                                                                                                                      |
| HighDeltaPOST | 687 | ACTCGGCTCACTGCAACTTCCGCCTTCCCGGGTTCAAGCGATTCTCCTGG                                                                                                                                                                                                                                                                                                                      |
| LowDeltaPOST  | 695 | ACTCGGCTCACTGCAACTTCCGCCTTCCCGGGTTCAAGCGATTCTCCTGG                                                                                                                                                                                                                                                                                                                      |
|               |     | <div style="display: flex; justify-content: space-between; width: 100%;"> <span>760</span> <span>770</span> <span>780</span> <span>790</span> <span>800</span> </div> <div style="display: flex; justify-content: space-between; width: 100%; font-size: small;"> <span>.....</span> <span>.....</span> <span>.....</span> <span>.....</span> <span>.....</span> </div> |
| Reference     | 745 | CTCAGCCTCCGGAGTAGCTAGGACTACAGGCGCGTGTCAACCATGTCCCAG                                                                                                                                                                                                                                                                                                                     |
| HighDeltaPOST | 737 | CTCAGCCTCCGGAGTAGCTAGGACTACAGGCGCGTGTCAACCATGTCCCAG                                                                                                                                                                                                                                                                                                                     |
| LowDeltaPOST  | 745 | CTCAGCCTCCGGAGTAGCTAGGACTACAGGCGCGTGTCAACCATGTCCCAG                                                                                                                                                                                                                                                                                                                     |
|               |     | <div style="display: flex; justify-content: space-between; width: 100%;"> <span>810</span> <span>820</span> <span>830</span> <span>840</span> <span>850</span> </div> <div style="display: flex; justify-content: space-between; width: 100%; font-size: small;"> <span>.....</span> <span>.....</span> <span>.....</span> <span>.....</span> <span>.....</span> </div> |
| Reference     | 795 | CTAATCTTTCTTTATTTTTAGTAGAGACGTGTTAGCCAGGTTTACCCGTG                                                                                                                                                                                                                                                                                                                      |
| HighDeltaPOST | 787 | CTAATCTTTCTTTATTTTTAGTAGAGACGTGTTAGCCAGGTTTACCCGTG                                                                                                                                                                                                                                                                                                                      |
| LowDeltaPOST  | 795 | CTAATCTTTCTTTATTTTTAGTAGAGACGTGTTAGCCAGGTTTACCCGTG                                                                                                                                                                                                                                                                                                                      |
|               |     | <div style="display: flex; justify-content: space-between; width: 100%;"> <span>860</span> <span>870</span> <span>880</span> <span>890</span> <span>900</span> </div> <div style="display: flex; justify-content: space-between; width: 100%; font-size: small;"> <span>.....</span> <span>.....</span> <span>.....</span> <span>.....</span> <span>.....</span> </div> |
| Reference     | 845 | TTACCGTGTTACCGTATTCCAGCCGGGCTCCGCCCTGGATTCCGGTGGAC                                                                                                                                                                                                                                                                                                                      |
| HighDeltaPOST | 837 | TTACCGTGTTACCGTATTCCAGCCGGGCTCCGCCCTGGATTCCGGTGGAC                                                                                                                                                                                                                                                                                                                      |
| LowDeltaPOST  | 845 | TTACCGTGTTACCGTATTCCAGCCGGGCTCCGCCCTGGATTCCGGTGGAC                                                                                                                                                                                                                                                                                                                      |
|               |     | <div style="display: flex; justify-content: space-between; width: 100%;"> <span>910</span> <span>920</span> <span>930</span> <span>940</span> <span>950</span> </div> <div style="display: flex; justify-content: space-between; width: 100%; font-size: small;"> <span>.....</span> <span>.....</span> <span>.....</span> <span>.....</span> <span>.....</span> </div> |
| Reference     | 895 | AGAC <b>C</b> AGCTTTACCTCCAGAGACTCCCCCTGTCTTCCCTGCACCCGGCTGA                                                                                                                                                                                                                                                                                                            |
| HighDeltaPOST | 887 | AGAC <b>C</b> AGCTTTACCTCCAGAGACTCCCCCTGTCTTCCCTGCACCCGGCTGA                                                                                                                                                                                                                                                                                                            |
| LowDeltaPOST  | 895 | AGAC <b>C</b> AGCTTTACCTCCAGAGACTCCCCCTGTCTTCCCTGCACCCGGCTGA                                                                                                                                                                                                                                                                                                            |

960 970 980 990 1000  
 .....|.....|.....|.....|.....|.....|.....|.....|.....|.....|.....|  
 Reference 945 CTATACCTACACACTTCGGTGGCACAATCTTTGTTTAGATATGCTGATGC  
 HighDeltaPOST 937 CTATACCTACACACTTCGGTGGCACAATCTTTGTTTAGATATGCTGATGC  
 LowDeltaPOST 945 CTATACCTACACACTTCGGTGGCACAATCTTTGTTTAGATATGCTGATGC

1010 1020 1030 1040 1050  
 .....|.....|.....|.....|.....|.....|.....|.....|.....|.....|.....|  
 Reference 995 CTTTCCTTCGCTGGGAACGGTCCAGTCTTGCCCGCCTGGCGCTCAGCTCTG  
 HighDeltaPOST 987 CTTTCCTTCGCTGGGAACGGTCCAGTCTTGCCCGCCTGGCGCTCAGCTCTG  
 LowDeltaPOST 995 CTTTCCTTCGCTGGGAACGGTCCAGTCTTGCCCGCCTGGCGCTCAGCTCTG

1060 1070 1080 1090 1100  
 .....|.....|.....|.....|.....|.....|.....|.....|.....|.....|.....|  
 Reference 1045 CGGATCTCAGGGGATGGAGTGGCAATCTCATTGCTCCCGCCTCTCCTGAC  
 HighDeltaPOST 1037 CGGATCTCAGGGGATGGAGTGGCAATCTCATTGCTCCCGCCTCTCCTGAC  
 LowDeltaPOST 1045 CGGATCTCAGGGGATGGAGTGGCAATCTCATTGCTCCCGCCTCTCCTGAC

1110 1120 1130 1140 1150  
 .....|.....|.....|.....|.....|.....|.....|.....|.....|.....|.....|  
 Reference 1095 CCCTCTCGCCTTCTCCTCGAGACCCGGGTTAAGTGGGCAGAGGGCTCCGA  
 HighDeltaPOST 1087 CCCTCTCGCCTTCTCCTCGAGACCCGGGTTAAGTGGGCAGAGGGCTCCGA  
 LowDeltaPOST 1095 CCCTCTCGCCTTCTCCTCGAGACCCGGGTTAAGTGGGCAGAGGGCTCCGA

1160 1170 1180 1190 1200  
 .....|.....|.....|.....|.....|.....|.....|.....|.....|.....|.....|  
 Reference 1145 GGGTCCTCTCCCGCCGTGGGATTGCACAGAGGGCTGGGTCCGCAGGCTGG  
 HighDeltaPOST 1137 GGGTCCTCTCCCGCCGTGGGATTGCACAGAGGGCTGGGTCCGCAGGCTGG  
 LowDeltaPOST 1145 GGGTCCTCTCCCGCCGTGGGATTGCACAGAGGGCTGGGTCCGCAGGCTGG

1210 1220 1230 1240 1250  
 .....|.....|.....|.....|.....|.....|.....|.....|.....|.....|.....|  
 Reference 1195 CTAAAAGGACCTAGCCAGGATTGCGAGGCAGCGCCCTCCCTGCAGCTGG  
 HighDeltaPOST 1187 CTAAAAGGACCTAGCCAGGATTGCGAGGCAGCGCCCTCCCTGCAGCTGG  
 LowDeltaPOST 1195 CTAAAAGGACCTAGCCAGGATTGCGAGGCAGCGCCCTCCCTGCAGCTGG

1260 1270 1280 1290 1300  
 .....|.....|.....|.....|.....|.....|.....|.....|.....|.....|.....|  
 Reference 1245 ACAGACTCGGGCGCCCGGCCAAAGCCCGGCAGGGGCGTGTCCGCGCGCT  
 HighDeltaPOST 1237 ACAGACTCGGGCGCCCGGCCAAAGCCCGGCAGGGGCGTGTCCGCGCGCT  
 LowDeltaPOST 1245 ACAGACTCGGGCGCCCGGCCAAAGCCCGGCAGGGGCGTGTCCGCGCGCT

1310 1320 1330 1340 1350  
 .....|.....|.....|.....|.....|.....|.....|.....|.....|.....|.....|  
 Reference 1295 CACCTGCTATTGGCCAGGTGGGGCTGTCCGCTGCCAGCAGTGCTTATGCT  
 HighDeltaPOST 1287 CACCTGCTATTGGCCAGGTGGGGCTGTCCGCTGCCAGCAGTGCTTATGTT  
 LowDeltaPOST 1295 CACCTGCTATTGGCCAGGTGGGGCTGTCCGCTGCCAGCAGTGCTTATGCT

1360 1370 1380 1390  
 .....|.....|.....|.....|.....|.....|.....|.....|.....|.....|.....|  
 Reference 1345 TTAAGTGGCGAGCGGGTGGCTGCGGAGCCAGGCGCGGCGCAG  
 HighDeltaPOST 1337 TTAAGTGGCGAGCGGGTGGCTGCGGAGCCAGGCGCGGCGCAG  
 LowDeltaPOST 1345 TTAAGTGGCGAGCGGGTGGCTGCGGAGCCAGGCGCGGCGCAG
