# Supplementary material for: Genome-Wide Meta-Analysis of Homocysteine and Methionine Metabolism Identifies Five One Carbon Metabolism Loci and a Novel Association of ALDH1L1 with Ischemic Stroke
Source: PubMed Central journal article supplement (PMC3961178; doi:10.1371/journal.pgen.1004214), 2014-03-20
Supplement: pgen.1004214.s006.pdf [file pgen.1004214.s006.pdf]

| Study       | RS#       | Chromosome | Position (bp) | Associated Gene   | Gene Region                            | Alleles (Minor/Major) | MAF   | N    | SE    | P-value                |
|-------------|-----------|------------|---------------|-------------------|----------------------------------------|-----------------------|-------|------|-------|------------------------|
| <b>VISP</b> |           |            |               |                   |                                        |                       |       |      |       |                        |
|             | rs1129186 | 6          | 42932202      | <i>GNMT/PEX6</i>  | <i>GNMT</i> 3' / <i>PEX6</i> Exon 1    | C/T                   | 0.546 | 2100 | 0.031 | 2.47x10 <sup>-23</sup> |
|             | rs234714  | 21         | 44488033      | <i>CBS</i>        | Intron 4 / 5' UTR                      | T/C                   | 0.223 | 2100 | 0.037 | 1.04x10 <sup>-9</sup>  |
| <b>FHS</b>  |           |            |               |                   |                                        |                       |       |      |       |                        |
|             | rs9471968 | 6          | 42905235      | <i>CNPY3/GNMT</i> | <i>CNPY3</i> Intron 3 / <i>GNMT</i> 5' | A/G                   | 0.466 | 2710 | 0.026 | 7.35x10 <sup>-43</sup> |
|             | rs234714  | 21         | 44488033      | <i>CBS</i>        | Intron 4 / 5' UTR                      | T/C                   | 0.201 | 2710 | 0.046 | 2.29x10 <sup>-18</sup> |
|             | rs1047891 | 2          | 211540507     | <i>CPS1</i>       | Exon 37 missense Ser (ACC) / Phe (AAC) | A/C                   | 0.306 | 2710 | 0.034 | 1.35x10 <sup>-8</sup>  |
|             | rs2364368 | 3          | 125905080     | <i>ALDH1L1</i>    | 5'                                     | T/A                   | 0.425 | 2710 | 0.027 | 4.04x10 <sup>-13</sup> |
|             | rs4948102 | 7          | 56097265      | <i>PSPH</i>       | Intron 3                               | C/G                   | 0.249 | 2710 | 0.035 | 1.40x10 <sup>-15</sup> |
