# Supplementary material for: Genome-Wide Meta-Analysis of Homocysteine and Methionine Metabolism Identifies Five One Carbon Metabolism Loci and a Novel Association of ALDH1L1 with Ischemic Stroke
Source: PubMed Central journal article supplement (PMC3961178; doi:10.1371/journal.pgen.1004214), 2014-03-20
Supplement: pgen.1004214.s007.pdf [file pgen.1004214.s007.pdf]

**FHS**

| <b>Covariate</b>         | <b>AGE</b> | <b>PC1</b> | <b>PC2</b> | <b>PC3</b> | <b>PC4</b> | <b>PC5</b> | <b>PC6</b> | <b>PC7</b> | <b>PC8</b> | <b>PC9</b> | <b>PC10</b> |
|--------------------------|------------|------------|------------|------------|------------|------------|------------|------------|------------|------------|-------------|
| <b>ΔPOST Correlation</b> | -0.055     | -0.047     | -0.016     | 0.003      | 0.027      | 0.009      | 0.034      | -0.016     | 0.008      | -0.004     | 0.012       |
| <b>P-value</b>           | 0.004      | 0.015      | 0.42       | 0.87       | 0.16       | 0.63       | 0.078      | 0.41       | 0.69       | 0.85       | 0.52        |

**VISP**

| <b>Covariate</b>         | <b>AGE</b> | <b>PC1</b> | <b>PC2</b> | <b>PC3</b> | <b>PC4</b> | <b>PC5</b> | <b>PC6</b> | <b>PC7</b> | <b>PC8</b> | <b>PC9</b> | <b>PC10</b> |
|--------------------------|------------|------------|------------|------------|------------|------------|------------|------------|------------|------------|-------------|
| <b>ΔPOST Correlation</b> | -0.045     | -0.111     | -0.010     | 0.057      | -0.008     | -0.004     | -0.017     | 0.011      | 0.039      | -0.020     | 0.004       |
| <b>P-value</b>           | 0.0467     | <.0001     | 0.6586     | 0.0127     | 0.727      | 0.8746     | 0.4577     | 0.6301     | 0.0911     | 0.3735     | 0.8533      |
